# Supplementary material
Source: Springer Nature journal article supplement (https://www.springermedizin.de/resource/supplementary/12936_2014_3326_MOESM12_ESM.pdf/9545666)
Supplement: MOESM12 [file 9545666]

|     |     |     |      |      |      |     |     |     |
|-----|-----|-----|------|------|------|-----|-----|-----|
| 5.9 | 4.2 | 5.9 | 43.5 | 49.2 | 13.3 | 3.7 | 2.3 | 5.0 |
|-----|-----|-----|------|------|------|-----|-----|-----|

166.0

|     |     |     |
|-----|-----|-----|
| 4.8 | 4.1 | 4.4 |
| 4.1 | 3.1 | 2.0 |
| 4.0 | 2.5 | 4.3 |
